# Supplementary material for: PRISMA guideline compliance is imperative for systematic review appraisal
Source: PubMed Central journal article supplement — Can J Kidney Health Dis. 2020 Jun 8;7:2054358120927594. doi: 10.1177/2054358120927594 (PMC7281638; doi:10.1177/2054358120927594), 2020-06-08
Supplement: MEDLINE_Search_06042016.pdf [file MEDLINE_Search_06042016.pdf]

Ovid MEDLINE(R) In-Process & Other Non-Indexed Citations and Ovid MEDLINE(R) 1946 to Present

| #  | Searches                                                                                                                                                                                                                  | Results | Type     |
|----|---------------------------------------------------------------------------------------------------------------------------------------------------------------------------------------------------------------------------|---------|----------|
| 1  | Renal Replacement Therapy/                                                                                                                                                                                                | 4118    | Advanced |
| 2  | exp Kidney Transplantation/                                                                                                                                                                                               | 84471   | Advanced |
| 3  | Kidney Transplant*.mp.                                                                                                                                                                                                    | 90171   | Advanced |
| 4  | grafting, kidney.mp.                                                                                                                                                                                                      | 4       | Advanced |
| 5  | kidney grafting*.mp.                                                                                                                                                                                                      | 64      | Advanced |
| 6  | renal transplant*.mp.                                                                                                                                                                                                     | 40778   | Advanced |
| 7  | transplant*, kidney*.mp.                                                                                                                                                                                                  | 3475    | Advanced |
| 8  | transplant*, renal.mp.                                                                                                                                                                                                    | 1225    | Advanced |
| 9  | graft*, renal.mp.                                                                                                                                                                                                         | 103     | Advanced |
| 10 | renal graft*.mp.                                                                                                                                                                                                          | 2747    | Advanced |
| 11 | exp Graft Rejection/                                                                                                                                                                                                      | 54010   | Advanced |
| 12 | graft* rejection*.mp.                                                                                                                                                                                                     | 57859   | Advanced |
| 13 | reject*, transplant*.mp.                                                                                                                                                                                                  | 197     | Advanced |
| 14 | reject*, graft*.mp.                                                                                                                                                                                                       | 779     | Advanced |
| 15 | transplant* reject*.mp.                                                                                                                                                                                                   | 3684    | Advanced |
| 16 | 11 or 12 or 13 or 14 or 15                                                                                                                                                                                                | 59748   | Advanced |
| 17 | exp Kidney/                                                                                                                                                                                                               | 322447  | Advanced |
| 18 | kidney*.mp.                                                                                                                                                                                                               | 739120  | Advanced |
| 19 | renal*.mp.                                                                                                                                                                                                                | 577538  | Advanced |
| 20 | 17 or 18 or 19                                                                                                                                                                                                            | 937284  | Advanced |
| 21 | 16 and 20                                                                                                                                                                                                                 | 24630   | Advanced |
| 22 | 1 or 2 or 3 or 4 or 5 or 6 or 7 or 8 or 9 or 10 or 21                                                                                                                                                                     | 102745  | Advanced |
| 23 | exp diphosphonates/ or exp alendronate/ or exp clodronic acid/ or exp etidronic acid/ or exp risedronate sodium/                                                                                                          | 22546   | Advanced |
| 24 | diphosphon*.mp.                                                                                                                                                                                                           | 17200   | Advanced |
| 25 | bisphosphon*.mp.                                                                                                                                                                                                          | 13669   | Advanced |
| 26 | biphosphon*.mp. [mp=title, abstract, original title, name of substance word, subject heading word, keyword heading word, protocol supplementary concept word, rare disease supplementary concept word, unique identifier] | 495     | Advanced |
| 27 | alendron*.mp. [mp=title, abstract, original title, name of substance word, subject heading word, keyword heading word, protocol supplementary concept word, rare disease supplementary concept word, unique identifier]   | 4552    | Advanced |
| 28 | clodron*.mp. [mp=title, abstract, original title, name of substance word, subject heading word, keyword heading word, protocol supplementary concept word, rare disease supplementary concept word, unique identifier]    | 2227    | Advanced |
| 29 | etidron*.mp. [mp=title, abstract, original title, name of substance word, subject heading word, keyword heading word, protocol supplementary concept word, rare disease supplementary concept word, unique identifier]    | 3109    | Advanced |
| 30 | pamidron*.mp. [mp=title, abstract, original title, name of substance word, subject heading word, keyword heading word, protocol supplementary concept word, rare disease supplementary concept word, unique identifier]   | 2849    | Advanced |
| 31 | pamindron*.mp. [mp=title, abstract, original title, name of substance word, subject heading word, keyword heading word, protocol supplementary concept word, rare disease supplementary concept word, unique identifier]  | 10      | Advanced |
| 32 | risedron*.mp. [mp=title, abstract, original title, name of substance word, subject heading word, keyword heading word, protocol supplementary concept word, rare disease supplementary concept word, unique identifier]   | 1723    | Advanced |
| 33 | risendron*.mp. [mp=title, abstract, original title, name of substance word, subject heading word, keyword heading word, protocol supplementary concept word, rare disease supplementary concept word, unique identifier]  | 12      | Advanced |
| 34 | zoledron*.mp. [mp=title, abstract, original title, name of substance word, subject heading word, keyword heading word, protocol supplementary concept word, rare disease supplementary concept word, unique identifier]   | 3930    | Advanced |
| 35 | zolendron*.mp. [mp=title, abstract, original title, name of substance word, subject heading word, keyword heading word, protocol supplementary concept word, rare disease supplementary concept word, unique identifier]  | 86      | Advanced |
| 36 | 23 or 24 or 25 or 26 or 27 or 28 or 29 or 30 or 31 or 32 or 33 or 34 or 35                                                                                                                                                | 30596   | Advanced |
| 37 | 22 and 36                                                                                                                                                                                                                 | 193     | Advanced |
