# Supplementary material for: PRISMA guideline compliance is imperative for systematic review appraisal
Source: PubMed Central journal article supplement — Can J Kidney Health Dis. 2020 Jun 8;7:2054358120927594. doi: 10.1177/2054358120927594 (PMC7281638; doi:10.1177/2054358120927594), 2020-06-08
Supplement: Supplemental_Tables_-_clean.pdf [file Supplemental_Tables_-_clean.pdf]

## Supplemental Table of Contents

|                                                                             |      |
|-----------------------------------------------------------------------------|------|
| Table S1 – Inclusion and Exclusion Criteria for the Systematic Review ..... | 1    |
| Figure S1 – Schema of Literature Search .....                               | 2    |
| Figure S2 – Bias Assessment for Randomized Control Trials .....             | 3    |
| Table S2 – Cochrane Risk of Bias for Randomized Control Trails .....        | 4    |
| Figure S3 – Bias Assessment for Observational Studies .....                 | 5    |
| Table S3 – Newcastle-Ottawa Risk of Bias for Observational Studies .....    | 6    |
| Figure S4 – Funnel Plot of Reported Outcomes .....                          | 7    |
| Table S4 - Confounding Factors Affecting Bone Mineral Density .....         | 8-10 |

**Table S1 – Inclusion and Exclusion Criteria for the Systematic Review**

| <b>Question Component</b> | <b>Inclusion Criteria</b>                                                                                                                                                                                                                                              | <b>Exclusion Criteria</b>                                                                                                                                   |
|---------------------------|------------------------------------------------------------------------------------------------------------------------------------------------------------------------------------------------------------------------------------------------------------------------|-------------------------------------------------------------------------------------------------------------------------------------------------------------|
| <b>Population</b>         | <ul style="list-style-type: none"> <li>• Adult patients (&gt; 18 years)</li> <li>• Renal transplant (deceased or living donor kidney transplantation)</li> <li>• Outcome data available &gt; 1 year post-renal transplantation</li> </ul>                              | <ul style="list-style-type: none"> <li>• Patients with other organ transplants, including kidney-pancreas transplantation</li> </ul>                        |
| <b>Intervention</b>       | <ul style="list-style-type: none"> <li>• Use of any bisphosphonate (oral or IV) post-renal transplant, alone or in combination with other agents (calcium, vitamin D, etc.)</li> </ul>                                                                                 |                                                                                                                                                             |
| <b>Outcomes</b>           | <p>Primary:</p> <ul style="list-style-type: none"> <li>• Change in BMD from baseline</li> </ul> <p>Secondary:</p> <ul style="list-style-type: none"> <li>• Fracture incidence</li> <li>• Other confounding variables (i.e. immunosuppression, BMI, smoking)</li> </ul> | <ul style="list-style-type: none"> <li>• Trials that did not provide information either on BMD or fracture incidence</li> </ul>                             |
| <b>Study Design</b>       | <ul style="list-style-type: none"> <li>• Randomized trials</li> <li>• Observational studies (cohort, case-control)</li> </ul>                                                                                                                                          | <ul style="list-style-type: none"> <li>• Case series</li> <li>• Case reports</li> <li>• Review articles (systematic, meta-analysis, descriptive)</li> </ul> |



**Figure S2 – Bias Assessment for Randomized Control Trials using the Cochrane Risk of Bias Tool Criteria [27]**

|                        | Selection Bias             |                        | Performance Bias                    | Detection Bias                 | Attrition Bias          | Reporting Bias      | Other Bias |
|------------------------|----------------------------|------------------------|-------------------------------------|--------------------------------|-------------------------|---------------------|------------|
|                        | Random Sequence Generation | Allocation Concealment | Participants and Personnel Blinding | Blinding of Outcome Assessment | Incomplete Outcome Data | Selective Reporting | Other Bias |
| Sánchez-Escuredo, 2015 | -                          | -                      | -                                   | -                              | +                       | +                   | -          |
| Okamoto, 2014          | -                          | -                      | -                                   | -                              | +                       | +                   | -          |
| Walsh, 2009            | +                          | +                      | +                                   | +                              | +                       | +                   | ?          |
| Lan, 2008              | -                          | -                      | -                                   | -                              | ?                       | -                   | -          |
| Schwarz, 2004          | -                          | -                      | +                                   | +                              | +                       | +                   | -          |
| Fan, 2003              | -                          | -                      | -                                   | -                              | +                       | +                   | ?          |
| Jeffery, 2003          | ?                          | ?                      | -                                   | -                              | +                       | ?                   | -          |
| Koc, 2002              | -                          | -                      | -                                   | -                              | +                       | ?                   | -          |

**Table S2 – Cochrane Risk of Bias Table for RCTs [27]**

| Cochrane Risk of Bias Tool Criteria  |                                   |                               |                                                 |                                       |                                |                            |                              |       |
|--------------------------------------|-----------------------------------|-------------------------------|-------------------------------------------------|---------------------------------------|--------------------------------|----------------------------|------------------------------|-------|
|                                      | Selection Bias                    |                               | Performance Bias                                | Detection Bias                        | Attrition Bias                 | Reporting Bias             | Other Bias                   | Total |
| Study                                | <i>Random Sequence Generation</i> | <i>Allocation Concealment</i> | <i>Blinding of Participants &amp; Personnel</i> | <i>Blinding of Outcome Assessment</i> | <i>Incomplete Outcome Data</i> | <i>Selective Reporting</i> | <i>Other Sources of Bias</i> |       |
| <b>Sánchez-Escuredo, et al. 2015</b> | 0                                 | 0                             | 0                                               | 0                                     | 2                              | 2                          | 0                            | 4     |
| <b>Okamoto, et al. 2014</b>          | 0                                 | 0                             | 0                                               | 0                                     | 2                              | 2                          | 0                            | 4     |
| <b>Walsh, et al. 2009</b>            | 2                                 | 2                             | 2                                               | 2                                     | 2                              | 2                          | 1                            | 13    |
| <b>Lan, et al. 2008</b>              | 0                                 | 0                             | 0                                               | 0                                     | 1                              | 0                          | 0                            | 1     |
| <b>Schwartz, et al. 2004</b>         | 0                                 | 0                             | 2                                               | 2                                     | 2                              | 2                          | 0                            | 8     |
| <b>Fan, et al. 2003</b>              | 0                                 | 0                             | 0                                               | 0                                     | 2                              | 2                          | 1                            | 5     |
| <b>Jeffrey, et al. 2003</b>          | 1                                 | 1                             | 0                                               | 0                                     | 2                              | 1                          | 0                            | 5     |
| <b>Koc, et al. 2002</b>              | 0                                 | 0                             | 0                                               | 0                                     | 2                              | 1                          | 0                            | 3     |

0 = high risk

1 = unclear

2 = low risk

**Figure S3 – Risk of Bias Graph for Observational Studies using the Newcastle-Ottawa Criteria [28]**

|                      |                | Selection                                                                           | Comparability                                                                       | Outcome Reporting                                                                    |
|----------------------|----------------|-------------------------------------------------------------------------------------|-------------------------------------------------------------------------------------|--------------------------------------------------------------------------------------|
| Case-Control Studies | Arlen, 2001    |    |    |    |
|                      | Huang, 2012    |    |    |    |
|                      | Tillman, 2016  |    |    |    |
| Cohort Studies       | Cruz, 2002     |    |    |    |
|                      | Ahn, 2006      |    |    |    |
|                      | Conley, 2008   |    |    |    |
|                      | Yamamoto, 2013 |   |   |   |
|                      | Naylor, 2014   |  |  |  |

**Table S3 – Newcastle-Ottawa Risk of Bias Table for Observational Studies**

| <b>Newcastle-Ottawa Criteria Case-Control Studies</b> |                                                                                                                            |                                                                                                                      |                                                                                                        |                         |
|-------------------------------------------------------|----------------------------------------------------------------------------------------------------------------------------|----------------------------------------------------------------------------------------------------------------------|--------------------------------------------------------------------------------------------------------|-------------------------|
|                                                       | <b>Selection (/1)</b>                                                                                                      | <b>Comparability of Cohorts (/2)</b>                                                                                 | <b>Outcome (/1)</b>                                                                                    | <b>TOTAL SCORE (/4)</b> |
| <b>Study</b>                                          | <ul style="list-style-type: none"> <li>Cases and controls clearly defined</li> <li>Representativeness of sample</li> </ul> | <ul style="list-style-type: none"> <li>Demographic characteristics</li> <li>Potential confounding factors</li> </ul> | <ul style="list-style-type: none"> <li>Ascertainment of exposure</li> <li>Non-response rate</li> </ul> |                         |
| Arlen, 2001                                           | 1                                                                                                                          | 2                                                                                                                    | 1                                                                                                      | 4                       |
| Huang, 2012                                           | 0                                                                                                                          | 1                                                                                                                    | 1                                                                                                      | 2                       |
| Tillman, 2016                                         | 1                                                                                                                          | 1                                                                                                                    | 1                                                                                                      | 3                       |

| <b>Newcastle-Ottawa Criteria Cohort Studies</b> |                                                                                                                                                                                      |                                                                                                                      |                                                                                                                                                            |                         |
|-------------------------------------------------|--------------------------------------------------------------------------------------------------------------------------------------------------------------------------------------|----------------------------------------------------------------------------------------------------------------------|------------------------------------------------------------------------------------------------------------------------------------------------------------|-------------------------|
|                                                 | <b>Selection (/1)</b>                                                                                                                                                                | <b>Comparability of Cohorts (/2)</b>                                                                                 | <b>Outcome (/1)</b>                                                                                                                                        | <b>TOTAL SCORE (/4)</b> |
| <b>Study</b>                                    | <ul style="list-style-type: none"> <li>Ascertainment of exposure</li> <li>Representativeness of exposed and unexposed cohorts</li> <li>Outcome not present at study start</li> </ul> | <ul style="list-style-type: none"> <li>Demographic characteristics</li> <li>Potential confounding factors</li> </ul> | <ul style="list-style-type: none"> <li>Assessment method</li> <li>Blinding</li> <li>Follow-up length</li> <li>Losses to follow-up accounted for</li> </ul> |                         |
| Cruz, 2002                                      | 1                                                                                                                                                                                    | 2                                                                                                                    | 1                                                                                                                                                          | 4                       |
| Ahn, 2006                                       | 0                                                                                                                                                                                    | 2                                                                                                                    | 1                                                                                                                                                          | 3                       |
| Conley, 2008                                    | 1                                                                                                                                                                                    | 2                                                                                                                    | 1                                                                                                                                                          | 4                       |
| Yamamoto, 2013                                  | 0                                                                                                                                                                                    | 2                                                                                                                    | 1                                                                                                                                                          | 3                       |
| Naylor, 2014                                    | 0                                                                                                                                                                                    | 2                                                                                                                    | 1                                                                                                                                                          | 3                       |



**Figure S4 – Funnel Plot of Reported Outcomes**

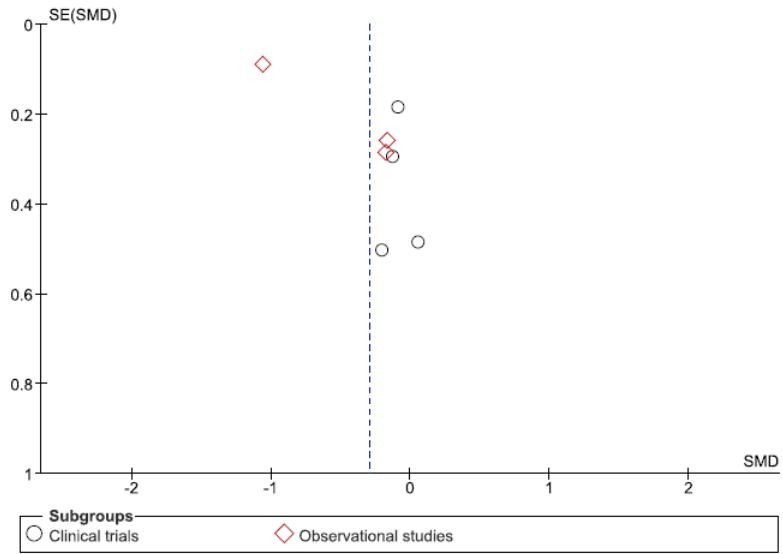

**Table S3 - Confounding Factors Affecting Bone Mineral Density in Post Renal Transplant Patients Between Bisphosphonate And Control Groups**

| <b>Steroid Use</b>          | <b>Description</b>                                                                                                                                                                                                                                                                                                                     | <b>Findings</b>                                                                                                                                                                                                    |
|-----------------------------|----------------------------------------------------------------------------------------------------------------------------------------------------------------------------------------------------------------------------------------------------------------------------------------------------------------------------------------|--------------------------------------------------------------------------------------------------------------------------------------------------------------------------------------------------------------------|
| Jeffery, et al. (2003) [37] | From baseline (n=211): <ul style="list-style-type: none"> <li>Cumulative prednisone dose = 43.0±35.8g</li> </ul>                                                                                                                                                                                                                       | <ul style="list-style-type: none"> <li>Prednisone correlated with decreased BMD at femur (univariate, p&lt;0.001)</li> <li>Prednisone was an independent predictor of low BMD (multivariate, p&lt;0.01)</li> </ul> |
| Ahn, et al. (2006) [44]     | Mean change in T-score (spine) over first year post-transplant: <ul style="list-style-type: none"> <li>Double IS regimen (CsA, tacrolimus, steroid)-0.57±0.70 (p = 0.26)</li> <li>Triple IS regimen (CsA, tacrolimus, steroid and mycophenolate mofetil): -0.46±0.66 (p = 0.26)</li> </ul>                                             | No significant difference in change in BMD over first year post-transplant based on IS regimens including steroid                                                                                                  |
| Huang, et al. (2012) [42]   | Patients stratified based on baseline bone health into 3 groups: normal/osteopenic/osteoporotic. The osteoporotic group was treated with Fosamax <ul style="list-style-type: none"> <li>Osteoporotic group received a greater cumulative steroid dose than the osteopenic group (1326.5 mg vs. 724.5 mg; p&lt;0.01)</li> </ul>         | Increase in lumbar spine BMD greater in the osteoporotic group than osteopenic group (0.033 g/cm <sup>2</sup> vs. 0.009 g/cm <sup>2</sup> ; p<0.05)                                                                |
|                             | To detect a difference in BMD at follow-up due to the use of IS agents, patients were divided into osteoporotic vs. non-osteoporotic based on their 1st follow-up BMD results. <ul style="list-style-type: none"> <li>Cumulative dose of prednisolone in non-osteoporotic/osteoporotic: 872±730mg/ 1326.5±961mg (p&lt;0.01)</li> </ul> | Prednisolone showed a positive association in patients with osteoporosis at follow-up BMD (univariate, OR 5.18; 95% CI 1.6–16.4, p<0.01)                                                                           |
| Naylor, et al. (2014) [40]  | β for glucocorticoid exposure in predictors of BMD model: between no previous osteoporosis/previous osteoporosis groups: <ul style="list-style-type: none"> <li>L-spine: -0.008 (p=0.22)/-0.001 (p=0.82)</li> <li>Total hip: -0.010 (p=0.08)/0.005 (p=0.28)</li> <li>Femoral neck: -0.004 (p=0.56)/0.010 (p=0.09)</li> </ul>           | Greater glucocorticoid exposure was not associated with significant change in BMD, regardless of prior osteoporosis treatment status (p>0.05)                                                                      |
| <b>Cyclosporine Use</b>     | <b>Description</b>                                                                                                                                                                                                                                                                                                                     | <b>Findings</b>                                                                                                                                                                                                    |
| Ahn, et al. (2006) [44]     | Mean change in T-score spine over first year post-transplant: (Cyclosporine/tacrolimus) -0.51±0.64/-0.41±0.76 (p=0.24)                                                                                                                                                                                                                 | No significant difference in change in BMD over first year post-transplant based on cyclosporine use                                                                                                               |
| Huang, et al. (2012) [42]   | Cyclosporine use (in 100 mg tablets) between osteoporotic and osteopenic groups 119.20±210.85/ 131.12±177.79 (p>0.05)                                                                                                                                                                                                                  | No significant difference in change in BMD between osteoporotic and osteopenic groups based on cyclosporine use at 1 year follow-up.                                                                               |
| <b>Gender</b>               | <b>Description</b>                                                                                                                                                                                                                                                                                                                     | <b>Findings</b>                                                                                                                                                                                                    |
| Jeffery, et al. (2003) [37] | From baseline (n=211): (Male/female = 149/62)                                                                                                                                                                                                                                                                                          | Female gender correlated with decreased overall BMD (univariate, p<0.05)                                                                                                                                           |
| Ahn, et al. (2006) [44]     | Mean change in T-score spine over first year post-transplant: <ul style="list-style-type: none"> <li>Male/female: -0.49±0.67/-0.47±0.66 (p=0.83)</li> </ul>                                                                                                                                                                            | Mean femoral T-score lower among female recipients (p<0.001). However gender did not influence change in BMD                                                                                                       |

|                               |                                                                                                                                                                                                                                                                                                                                                                                                                                                                                                                                                                                                                                                                     |                                                                                                                                                                                                                                      |
|-------------------------------|---------------------------------------------------------------------------------------------------------------------------------------------------------------------------------------------------------------------------------------------------------------------------------------------------------------------------------------------------------------------------------------------------------------------------------------------------------------------------------------------------------------------------------------------------------------------------------------------------------------------------------------------------------------------|--------------------------------------------------------------------------------------------------------------------------------------------------------------------------------------------------------------------------------------|
|                               |                                                                                                                                                                                                                                                                                                                                                                                                                                                                                                                                                                                                                                                                     | overall in first year post-transplant (p=0.83)                                                                                                                                                                                       |
| Tillmann, et al. (2016) [39]  | Control:<br><ul style="list-style-type: none"> <li>Males: LS: 4.5±7.8 %; FN: 1.7±10.7%</li> <li>Females: LS: 5.3±8.2%; FN: 5.8±14.7%</li> </ul> Mann-Whitney U: LS: p = 0.94; FN: p = 0.56                                                                                                                                                                                                                                                                                                                                                                                                                                                                          | No gender-specific effect on BMD (p>0.05)                                                                                                                                                                                            |
|                               | Ibandronate:<br><ul style="list-style-type: none"> <li>Males: LS: 7.2±6.8%; FN: 3.0±9.8%</li> <li>Females: LS: 5.8±8.9%; FN: 6.4±15.1%</li> </ul> Mann-Whitney U: LS: p = 0.60; FN: p = 0.70                                                                                                                                                                                                                                                                                                                                                                                                                                                                        | No gender-specific effects on BMD (p>0.05)                                                                                                                                                                                           |
| Huang, et al. (2012) [42]     | Overall BMD difference values were not different (p>0.05)                                                                                                                                                                                                                                                                                                                                                                                                                                                                                                                                                                                                           | No significant gender-related differences in bone turnover during 14-month period of mean follow-up (p>0.05).                                                                                                                        |
|                               | Fosamax increased the BMD at the lumbar spine and the hip in males (p<0.05), but only at the lumbar spine in females (p<0.05).                                                                                                                                                                                                                                                                                                                                                                                                                                                                                                                                      | Sites of action of Fosamax differ between genders                                                                                                                                                                                    |
| Naylor, et al. (2014) [40]    | β for male gender in predictors of BMD model: between no previous osteoporosis/previous osteoporosis groups:<br><ul style="list-style-type: none"> <li>L-spine: 0.003 (p=0.46)/0.008 (p&lt;0.01)*</li> <li>Total hip: 0.002 (p=0.53)/0.002 (p=0.38)</li> <li>Femoral neck: 0.005 (p=0.08)/-0.002 (p=0.55)</li> </ul>                                                                                                                                                                                                                                                                                                                                                | No overall clinically significant gender-related differences in BMD                                                                                                                                                                  |
| <b>BMI (kg/m<sup>2</sup>)</b> | <b>Description</b>                                                                                                                                                                                                                                                                                                                                                                                                                                                                                                                                                                                                                                                  | <b>Findings</b>                                                                                                                                                                                                                      |
| Jeffery, et al. (2003) [37]   | Raw baseline data from patients not provided                                                                                                                                                                                                                                                                                                                                                                                                                                                                                                                                                                                                                        | Low body weight (p<0.001) and low BMI (p<0.01) correlated with reduced lumbar and femoral BMD (univariate)                                                                                                                           |
| Ahn, et al. (2006) [44]       | Mean change in T-score spine over first year post-transplant:<br><ul style="list-style-type: none"> <li>&lt;18.5 = -0.5±0.67</li> <li>18.5 – 24.9 = -0.5±0.67</li> <li>≥25 = -0.34±0.60</li> </ul>                                                                                                                                                                                                                                                                                                                                                                                                                                                                  | Spine and femoral T-scores lower in patients with lower BMI. However BMI did not influence change in BMD in first year post-transplant (p=0.40)                                                                                      |
| Naylor, et al. (2014) [40]    | β for baseline BMI in predictors of BMD model: between no previous osteoporosis/previous osteoporosis groups:<br><ul style="list-style-type: none"> <li>L-spine: 0.0001 (p=0.95)/-0.000007 (p=1.0)</li> <li>Total hip: 0.0005 (p=0.70)/-0.0004 (p=0.71)</li> <li>Femoral neck: 0.0004 (p=0.76)/-0.001 (p=0.36)</li> </ul> β for change in BMI across scans in predictors of BMD model: between no previous osteoporosis/previous osteoporosis groups:<br><ul style="list-style-type: none"> <li>L-spine: 0.000 (p=0.88)/0.001 (p=0.28)</li> <li>Total hip: 0.002 (p&lt;0.05)*/0.00007 (p=0.84)</li> <li>Femoral neck: 0.002 (p&lt;0.05)*/-0.001 (p=0.34)</li> </ul> | Greater increases in BMI in the no prior osteoporosis treatment group were associated with significant increase in BMD at total hip and femoral neck (p<0.05)                                                                        |
| <b>Diabetes</b>               | <b>Description</b>                                                                                                                                                                                                                                                                                                                                                                                                                                                                                                                                                                                                                                                  | <b>Findings</b>                                                                                                                                                                                                                      |
| Jeffery, et al. (2003) [37]   | From baseline participant characteristics (n=211):<br><ul style="list-style-type: none"> <li>Pre-transplant diabetes = 29/211</li> </ul>                                                                                                                                                                                                                                                                                                                                                                                                                                                                                                                            | <ul style="list-style-type: none"> <li>Pre-transplant diabetes correlated with decreased BMD (univariate, p&lt;0.001)</li> <li>Pre-transplant diabetes was an independent predictor of low BMD (multivariate, p&lt;0.001)</li> </ul> |

|                           |                                                                                                                                                                |                                                                                                            |
|---------------------------|----------------------------------------------------------------------------------------------------------------------------------------------------------------|------------------------------------------------------------------------------------------------------------|
| Ahn, et al. (2006) [44]   | Mean change in T-score spine over first year post-transplant:<br>• No DM/DM: $-0.52 \pm 0.67 / -0.15 \pm 0.50$ ( $p < 0.01$ )                                  | Low BMD significantly correlated with being in non-diabetes group ( $p < 0.01$ )                           |
| Huang, et al. (2012) [42] | N=12/76 were diabetic (osteoporotic = 5, non-osteoporotic = 7)                                                                                                 | Binary logistic regression did not identify DM as significant factor in BMD (OR = ~0.6)                    |
| <b>HD Duration</b>        | <b>Description</b>                                                                                                                                             | <b>Findings</b>                                                                                            |
| Ahn, et al. (2006) [44]   | Mean change in T-score spine over first year post-transplant:<br>• HD < 12 months: $-0.39 \pm 0.57$ ( $p = 0.001$ )<br>• HD $\geq$ 12 months: $-0.67 \pm 0.79$ | Low BMD significantly correlated to longer period ( $\geq 12$ months) of HD pre-transplant ( $p = 0.001$ ) |
| <b>Smoking</b>            | <b>Description</b>                                                                                                                                             | <b>Findings</b>                                                                                            |
| Huang, et al. (2012) [42] | N=10/76 were smokers (all male); 5 had normal baseline BMD, 5 had osteoporosis at baseline BMD                                                                 | Binary logistic regression did not identify smoking as significant factor in BMD (OR = ~0.8)               |

Abbreviations:      BMD- Bone Mineral Density                      HD – Hemodialysis  
                               CsA – Cyclosporine                                              IS - immunosuppression  
                               LS lumbar spine                                                      FN – femoral neck
